# Supplementary material for: Gene function classification using Bayesian models with hierarchy-based priors
Source: Springer Nature journal article supplement (doi:10.1186/1471-2105-7-448), 2006-10-12
Supplement: Additional file 1 [file 1471-2105-7-448-s1.pdf]

| Evidence | bNumber | Class  | Class description                                                                                                                                                                                                                                                             |
|----------|---------|--------|-------------------------------------------------------------------------------------------------------------------------------------------------------------------------------------------------------------------------------------------------------------------------------|
| SE       | b0805   | 4.1.3  | Structural elements > Cell envelop > Outer membrane constituents<br><i>Cell structure &gt; Membrane</i><br><i>Location of gene products &gt; Outer membrane</i>                                                                                                               |
| SE       | b1519   | 3.2.8  | Metabolism of small molecules > Biosynthesis of cofactors, carriers > Menaquinone, ubiquinone<br><i>Metabolism &gt; Central intermediary metabolism &gt; Unassigned reversible reactions</i>                                                                                  |
| SE       | b1533   | 1.5.2  | Cell processes > Transport/binding proteins > ABC superfamily (membrane)<br><i>Transport &gt; Electrochemical potential driven transporters &gt; Porters (Uni-, Sym- and Antiporters) &gt; The Major Facilitator Superfamily (MFS)</i><br><i>Cell structure &gt; Membrane</i> |
| SE       | b1981   | 1.5.21 | Cell processes > Transport/bindingproteins > MFSfamily<br><i>Transport &gt; Electrochemical potential driven transporters &gt; Porters (Uni-, Sym- and Antiporters) &gt; The Major Facilitator Superfamily (MFS)</i>                                                          |
| SE       | b2210   | 3.4.3  | Metabolism of small molecules > Degradation of small molecules > Carbon compounds<br><i>Metabolism &gt; Energy metabolism (carbon) &gt; Tricarboxylic acid cycle</i>                                                                                                          |
| SE       | b3839   | 1.5.2  | Cell processes > Transport/binding proteins > ABC superfamily (membrane)<br><i>Transport &gt; Cell Substrate transported &gt; Protein</i><br><i>Cell structure &gt; Membrane</i>                                                                                              |
| SE       | b1822   | 2.2.1  | Macromolecule metabolism > Macromolecule synthesis, modification > Amino acyl tRNA syn; tRNA modification<br><i>Information transfer &gt; RNA related &gt; Modification</i>                                                                                                   |
| SE       | b3223   | 3.4.3  | Metabolism of small molecules > Degradation of small molecules > Carbon compounds<br><i>Metabolism &gt; Central intermediary metabolism &gt; Amino sugar conversions</i>                                                                                                      |
| SE       | b3337   | 3.5.2  | Metabolism of small molecules > Energy metabolism, carbon > Anaerobic respiration<br><i>Cell processes &gt; Adaptation to stress &gt; Fe aquisition</i>                                                                                                                       |
| SE       | b3569   | 3.4.3  | Metabolism of small molecules > Degradation of small molecules > Carbon compounds<br><i>Metabolism &gt; Carbon compound utilization &gt; Carbohydrate degradation</i>                                                                                                         |
| SE       | b3955   | 4.1.3  | Structural elements > Cell envelop > Outer membrane constituents<br><i>Cell structure &gt; Membrane</i>                                                                                                                                                                       |
| SE       | b3222   | 3.4.3  | Metabolism of small molecules > Degradation of small molecules > Carbon compounds<br><i>Metabolism &gt; Central intermediary metabolism &gt; Amino sugar conversions</i>                                                                                                      |
| SE       | b0570   | 6.1.1  | Global functions > Global regulatory functions<br><i>Regulation &gt; Type of regulation &gt; Transcriptional level</i>                                                                                                                                                        |
| SE       | b0619   | 6.1.1  | Global functions > Global regulatory functions<br><i>Regulation &gt; Type of regulation &gt; Transcriptional level</i>                                                                                                                                                        |
| SE       | b2219   | 6.1.1  | Global functions > Global regulatory functions<br><i>Regulation &gt; Type of regulation &gt; Transcriptional leve</i>                                                                                                                                                         |
| SE       | b0505   | 3.3.15 | Metabolism of small molecules > Central intermediary metabolism > Pool, multipurpose conversions of intermed. met_m<br><i>Metabolism &gt; Central intermediary metabolism &gt; Allantoin assimilation</i>                                                                     |
| SE       | b0508   | 3.4.3  | Metabolism of small molecules > Degradation of small molecules > Carbon compounds<br><i>Metabolism &gt; Central intermediary metabolism</i>                                                                                                                                   |
| SE       | b0662   | 3.5.2  | Metabolism of small molecules > Energy metabolism, carbon > Anaerobic respiration<br><i>Metabolism &gt; Energy metabolism (carbon) &gt; Aerobic respiration</i>                                                                                                               |
| SE       | b0789   | 2.2.7  | Macromolecule metabolism > Macromolecule synthesis, modification > Phospholipids<br><i>Metabolism &gt; Macromolecule (cellular constituent) biosynthesis &gt; Phospholipid</i>                                                                                                |
| SE       | b2924   | 4.1.2  | Structural elements > Cell envelop > Murein sacculus, peptidoglycan<br><i>Cell structure &gt; Membrane</i>                                                                                                                                                                    |
| SE       | b2052   | 3.3.18 | Metabolism of small molecules > Central intermediary metabolism > Sugar-nucleotide biosynthesis, conversions<br><i>Metabolism &gt; Macromolecule (cellular constituent) biosynthesis &gt; Colanic acid (M antigen)</i>                                                        |
| SE       | b2889   | 2.2.3  | Macromolecule metabolism > Macromolecule synthesis, modification > DNA - replication, repair, restriction/modification<br><i>Metabolism &gt; Building block biosynthesis &gt; Cofactor; small molecule carrier biosynthesis &gt; Isoprenoid</i>                               |

| Evidence | bNumber | Class  | Class description                                                                                                                                                                                           |
|----------|---------|--------|-------------------------------------------------------------------------------------------------------------------------------------------------------------------------------------------------------------|
| NE       | b2392   | 3.5.2  | Metabolism of small molecules > Energy metabolism, carbon > Anaerobic respiration<br><i>Transport &gt; Substrate transported &gt; Mn+/H</i>                                                                 |
| NE       | b0103   | 1.5.1  | Cell processes > Transport/binding proteins > ABC superfamily (atp_bind)<br><i>Metabolism &gt; Building block biosynthesis &gt; Cofactor, small molecule carrier biosynthesis &gt; Coenzyme A</i>           |
| NE       | b2530   | 3.3.15 | Metabolism of small molecules > Central intermediary metabolism > Pool, multipurpose conversions of intermed. met_m<br><i>Information transfer &gt; Protein related &gt; Posttranslational modification</i> |
| NE       | b0162   | 3.5.2  | Metabolism of small molecules > Energy metabolism, carbon > Anaerobic respiration<br><i>Regulation &gt; Genetic unit regulated &gt; Regulon</i>                                                             |
| NE       | b0613   | 3.4.3  | Metabolism of small molecules > Degradation of small molecules > Carbon compounds<br><i>Information transfer --&gt; Protein related</i>                                                                     |
| NE       | b2972   | 3.4.3  | Metabolism of small molecules > Degradation of small molecules > Carbon compounds<br><i>Information transfer &gt; Protein related &gt; Export, signal peptide cleavage</i>                                  |
| NE       | b0053   | 2.1.1  | Macromolecule metabolism > Macromolecule degradation > Degradation of DNA<br><i>Information transfer &gt; Protein related &gt; Chaperone, folding</i>                                                       |
| NE       | b0441   | 1.7.1  | Cell processes > Cell division<br><i>Information transfer &gt; Protein related &gt; Chaperone, folding</i>                                                                                                  |
| NE       | b1199   | 1.5.23 | Cell processes > Transport/binding proteins > Mechanism not stated<br><i>Metabolism &gt; Central intermediary metabolism &gt; Unassigned reversible reactions</i>                                           |
| NE       | b3836   | 4.2.2  | Structural elements > Ribosome constituents > Ribosomal proteins - synthesis, modification<br><i>Cell structure &gt; Membrane<br/>Location of gene products &gt; Inner membrane</i>                         |
| NE       | b3838   | 5.1.2  | Extrachromosomal > Laterally acquired elements > Phage-related functions and prophages<br><i>Cell structure &gt; Membrane<br/>Location of gene products &gt; Inner membrane</i>                             |
